# Supplementary material
Source: PubMed Central journal article supplement (PMC11005622)
Supplement: NIHPP2023.07.20.549951v3-supplement-1.pdf [file NIHPP2023.07.20.549951v3-supplement-1.pdf]

## Supplementary Figures and Tables

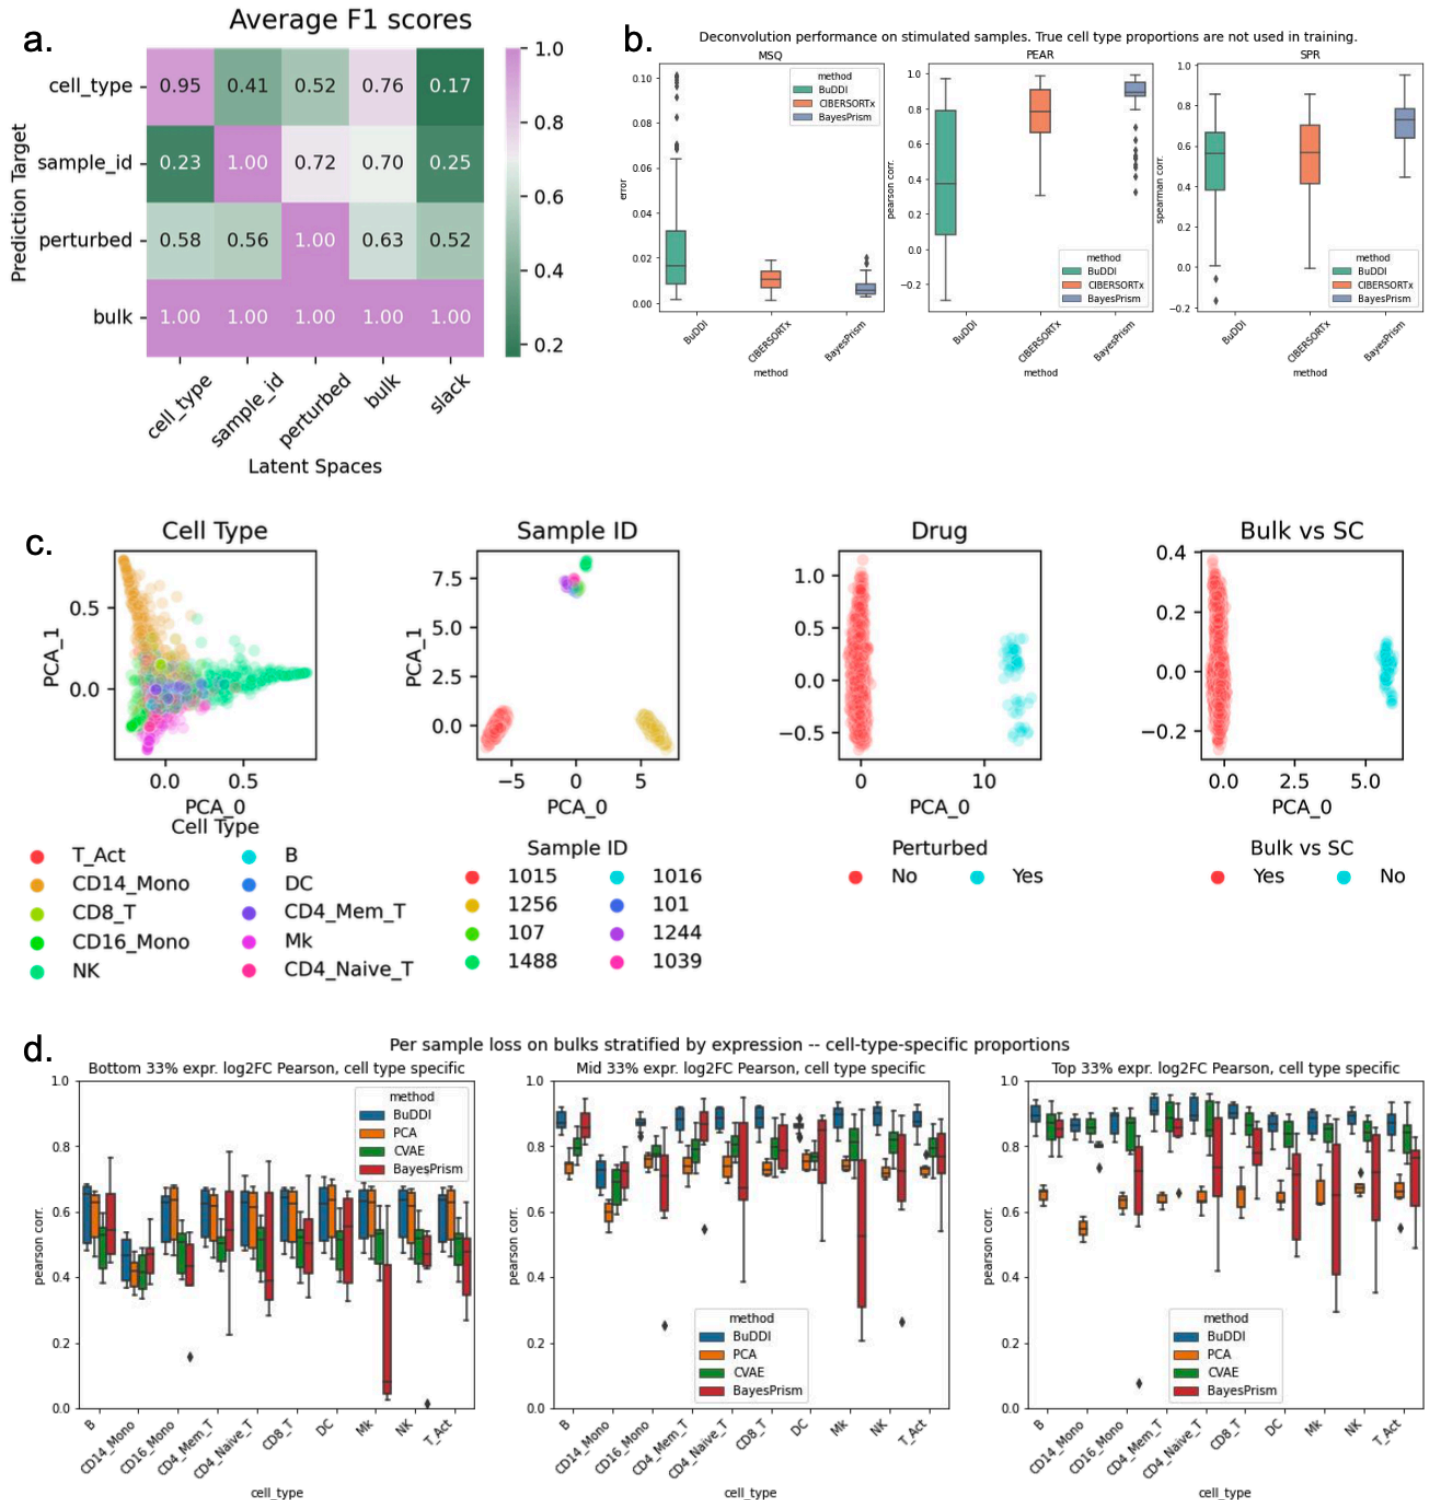

**Supp Figure 1.** Latent space analysis of BuDDI on Kang et al. data set with an experimental design where bulk samples are correlated with the sample IDs and perturbation status. **Panel a** depicts that average F1 score of each latent space to predict each source of variation. Midpoint coloration is the average across all observed F1 scores. Panel b compares the performance of BuDDI, CIBERSORTx, and BayesPrism, in estimating the cell type proportions. Panel c depicts each of BuDDI's latent spaces, colored by source of variation. Panel d depicts the Pearson correlation of the simulated perturbation expression, stratified by expression level.

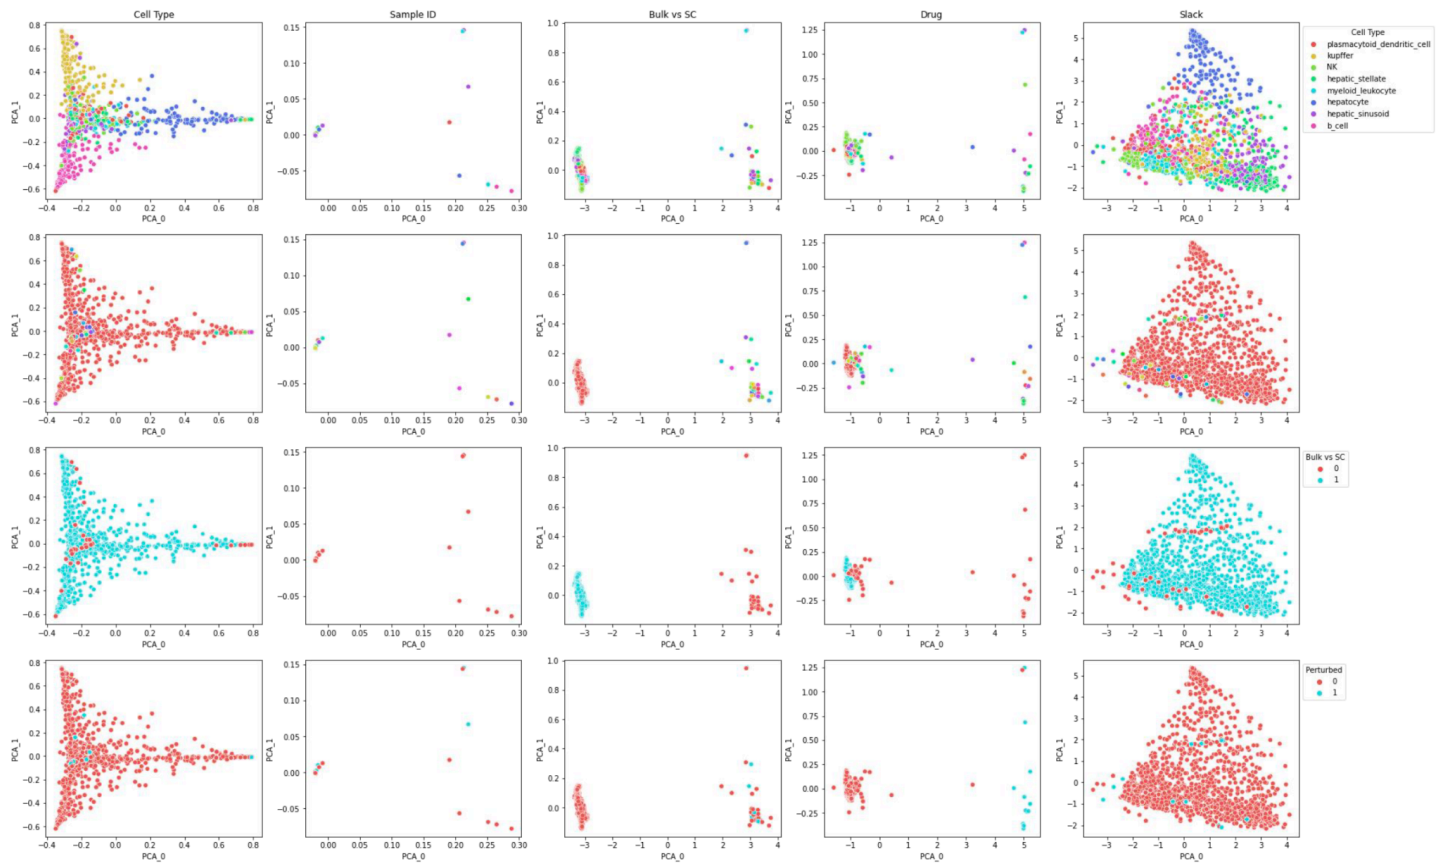

**Supp Figure 2.** Latent space analysis of BuDDI on Tabula Muris Senis dataset. Each column is a latent space and each row is colored by a source of variation. The second row is colored by sample ID, but due to the number of bulk samples, we omit the sample ID legend.

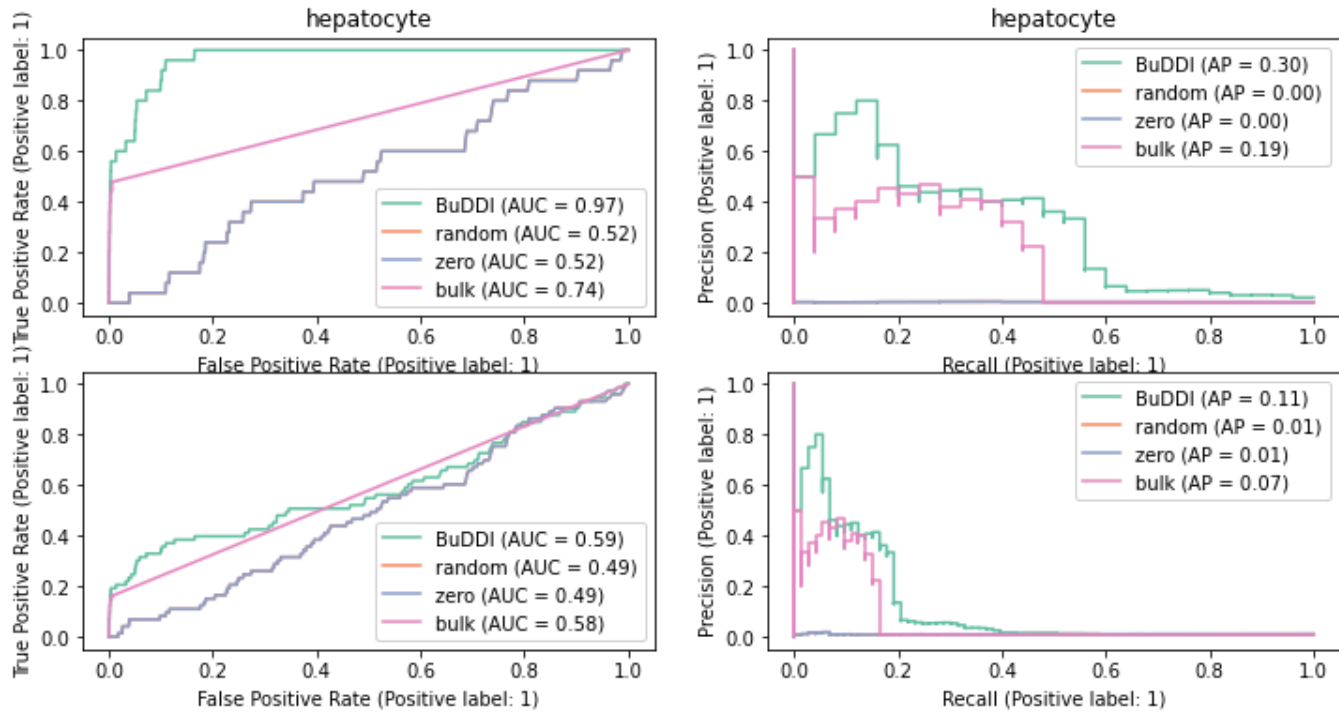

**Supp Figure 3.** ROC and PR curves for predicting differentially expressed genes between sexes in hepatocytes using BuDDI. Top row uses the differentially expressed genes from an independent single-nucleus experiment<sup>46</sup> as the ground truth, bottom row uses the union of the single-nucleus and our calculated single-cell results from Tabula Muris Senis<sup>41,42</sup> as the ground truth.

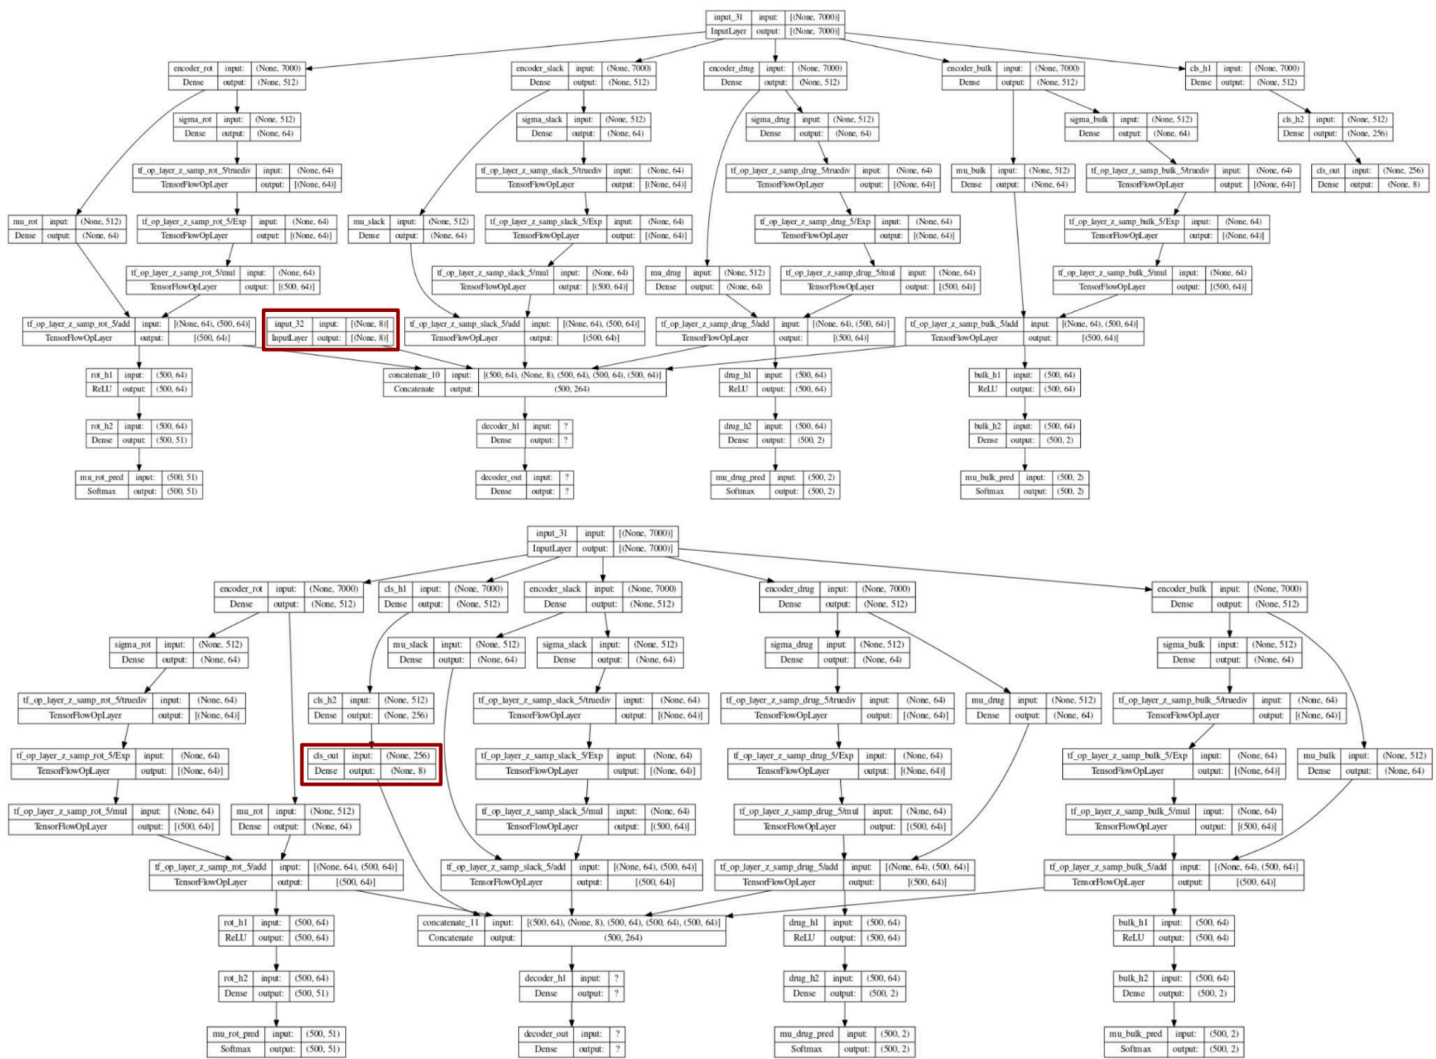

**Supp Figure 4.** BuDDI model overview for the supervised (top) and unsupervised (bottom) models. The red box highlights the true or estimated cell type proportions used in BuDDI.

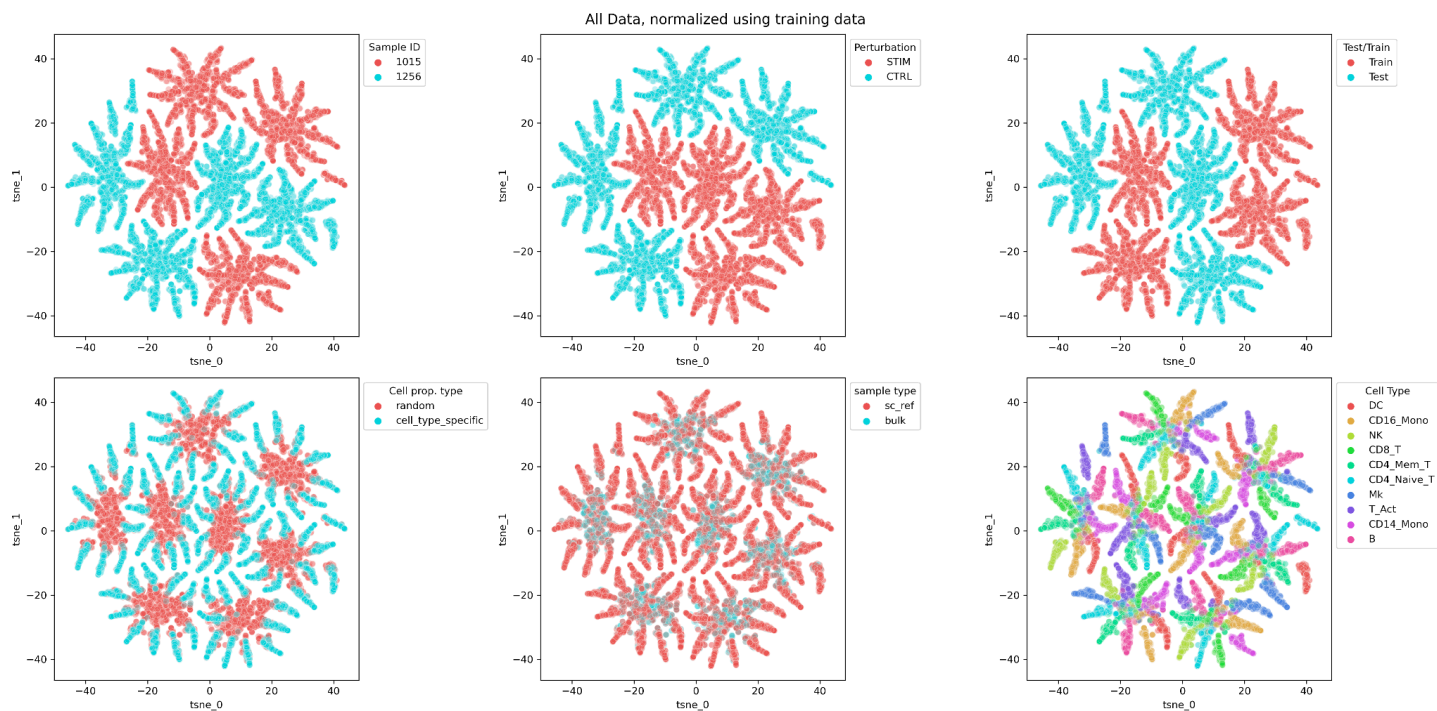

**Supp Figure 5.** Pseudobulk data generated and colored by source of variation. Our generated data shows independence between, each source of variation, including cell type proportion.

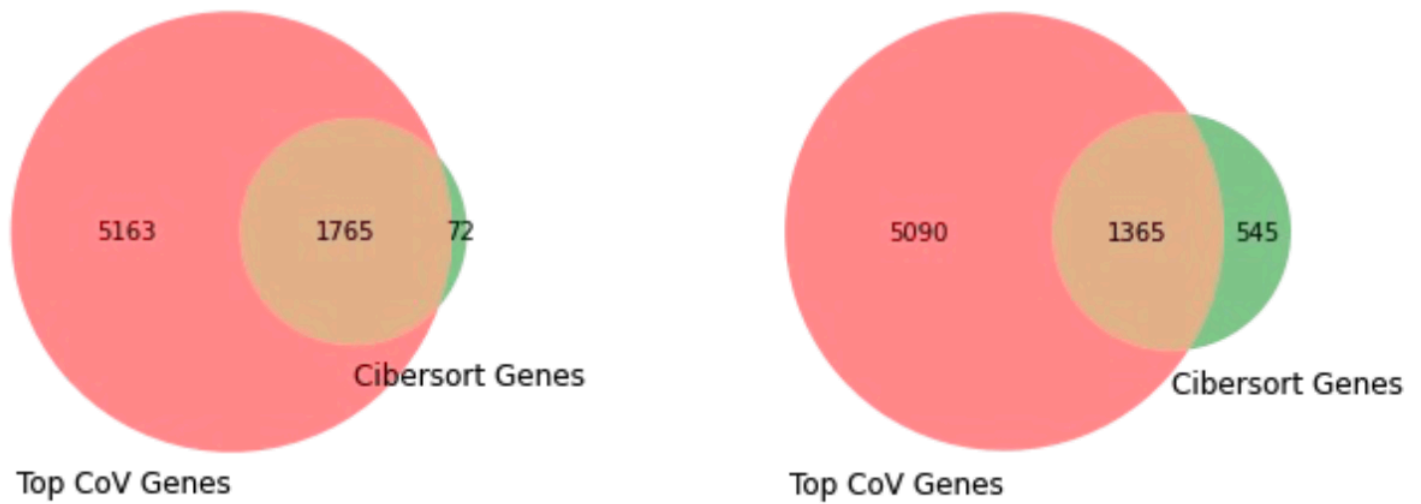

**Supp Figure 6.** Overlap of top coefficient of variation genes and CIBERSORTx signature genes used in the Kang et al. (left) and sex-dependent liver (right) analyses.

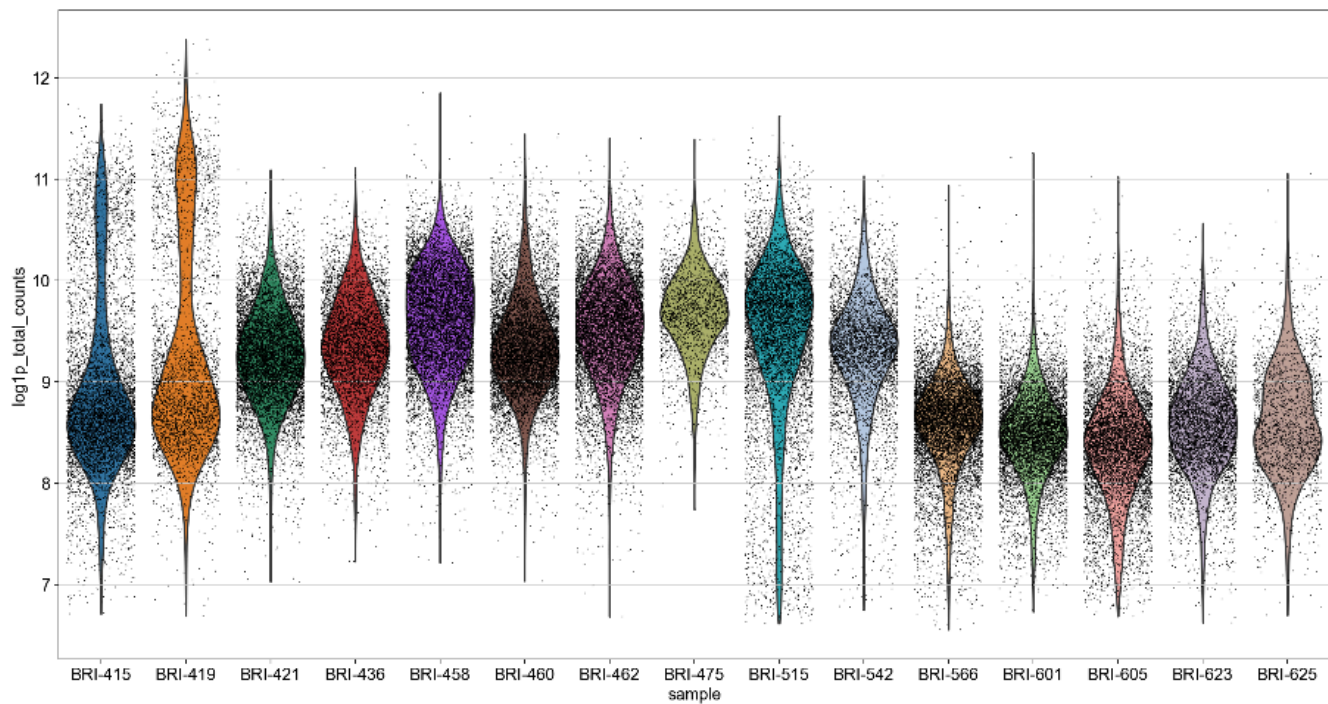

**Supp Figure 7.** Log total counts for each single-cell synovium sample from Zhang et al.<sup>3</sup>. Only samples with sufficient expression were used in our analysis, this includes samples 421, 436, 458, 460, 462, 475, 515, and 542.

| Cell Type in Kang et al. | Number of cells after filtering | Sample ID in Kang et al. | Number of cells after filtering |
|--------------------------|---------------------------------|--------------------------|---------------------------------|
| CD14 Monocyte            | 4361                            | 1015                     | 3177                            |
| CD4 Naive T cells        | 2504                            | 1256                     | 2396                            |
| CD4 Memory T cells       | 1762                            | 1499                     | 2280                            |
| B cells                  | 1363                            | 1244                     | 2031                            |
| CD16 Monocytes           | 1044                            | 1016                     | 1484                            |
| CD8 T cells              | 813                             | 101                      | 1224                            |
| T Activated              | 633                             | 1039                     | 679                             |
| NK                       | 619                             | 107                      | 668                             |
| CD                       | 604                             |                          |                                 |
| Mk                       | 236                             |                          |                                 |

**Supp Table 1.** Number of cells by cell type and by sample ID in the Kang et al. dataset after filtering.

| cell_ontology_class | B cell | Kupffer cell | NK cell | duct epithelial cell | endothelial cell of hepatic sinusoid | hepatic stellate cell | hepatocyte | myeloid leukocyte | plasmacytoid dendritic cell |
|---------------------|--------|--------------|---------|----------------------|--------------------------------------|-----------------------|------------|-------------------|-----------------------------|
| mouse.id            |        |              |         |                      |                                      |                       |            |                   |                             |
| 1-M-62              | 1      | 5            | 2       | 0                    | 25                                   | 2                     | 434        | 1                 | 1                           |
| 1-M-63              | 16     | 609          | 245     | 0                    | 495                                  | 26                    | 881        | 34                | 14                          |
| 3-F-56              | 0      | 12           | 2       | 0                    | 9                                    | 1                     | 363        | 0                 | 0                           |
| 3-F-57              | 0      | 1            | 0       | 0                    | 5                                    | 0                     | 173        | 0                 | 0                           |
| 3-M-8/9             | 0      | 0            | 0       | 2                    | 5                                    | 0                     | 453        | 0                 | 0                           |
| 18-F-51             | 24     | 221          | 109     | 0                    | 27                                   | 2                     | 267        | 40                | 8                           |
| 21-F-54             | 39     | 25           | 32      | 0                    | 14                                   | 2                     | 250        | 4                 | 1                           |
| 24-M-58             | 0      | 0            | 0       | 0                    | 2                                    | 0                     | 74         | 0                 | 0                           |
| 24-M-59             | 3      | 18           | 7       | 0                    | 5                                    | 1                     | 4          | 5                 | 0                           |
| 30-M-3              | 33     | 1608         | 56      | 0                    | 3                                    | 0                     | 1          | 177               | 7                           |
| 30-M-4              | 14     | 3            | 11      | 0                    | 5                                    | 0                     | 0          | 12                | 1                           |
| 30-M-5              | 73     | 44           | 88      | 0                    | 80                                   | 5                     | 29         | 34                | 9                           |

**Supp Table 2.** Number of cells by sample ID and cell type after filtering and before combining the two cell types “endothelial cell of hepatic sinusoid” and “duct epithelial cell”

**characteristics: sex**      **f**   **m**

**characteristics: age**

|           |     |     |
|-----------|-----|-----|
| <b>12</b> | 2.0 | 4.0 |
| <b>15</b> | 2.0 | 4.0 |
| <b>18</b> | 2.0 | 4.0 |
| <b>21</b> | 2.0 | 4.0 |
| <b>24</b> | NaN | 3.0 |
| <b>27</b> | NaN | 4.0 |
| <b>3</b>  | 2.0 | 4.0 |
| <b>6</b>  | 2.0 | 4.0 |
| <b>9</b>  | 2.0 | 4.0 |

**Supp Table 3.** Number of bulk liver samples used in analysis by sample ID and age.

| <b>cell_type</b> | <b>B</b> | <b>Endothelial</b> | <b>Fibroblast</b> | <b>Myeloid</b> | <b>NK</b> | <b>T_CD4</b> | <b>T_CD8</b> | <b>T_other</b> |
|------------------|----------|--------------------|-------------------|----------------|-----------|--------------|--------------|----------------|
| <b>sample</b>    |          |                    |                   |                |           |              |              |                |
| BRI-415          | 1830     | 139                | 855               | 800            | 197       | 2567         | 703          | 279            |
| BRI-419          | 493      | 242                | 558               | 1385           | 127       | 715          | 270          | 107            |
| BRI-421          | 427      | 283                | 1795              | 2935           | 432       | 2059         | 772          | 328            |
| BRI-436          | 1121     | 79                 | 68                | 741            | 157       | 1827         | 1085         | 577            |
| BRI-458          | 1322     | 319                | 548               | 4286           | 59        | 1791         | 743          | 259            |
| BRI-460          | 811      | 903                | 5378              | 1363           | 110       | 297          | 182          | 59             |
| BRI-462          | 771      | 250                | 3216              | 4923           | 136       | 858          | 346          | 148            |
| BRI-475          | 87       | 90                 | 303               | 941            | 183       | 335          | 263          | 56             |
| BRI-515          | 1721     | 461                | 1956              | 546            | 384       | 1675         | 890          | 311            |
| BRI-542          | 594      | 496                | 293               | 1175           | 161       | 1246         | 744          | 271            |
| BRI-566          | 455      | 200                | 2169              | 299            | 407       | 2895         | 2574         | 639            |
| BRI-601          | 253      | 180                | 4032              | 2477           | 127       | 834          | 229          | 112            |
| BRI-605          | 2339     | 558                | 2083              | 924            | 150       | 1265         | 412          | 240            |
| BRI-623          | 250      | 317                | 82                | 2926           | 313       | 991          | 832          | 333            |
| BRI-625          | 80       | 451                | 267               | 595            | 119       | 522          | 193          | 96             |

**Supp Table 4.** Number of cells by sample ID and cell type from Zhang et. al.
